# Supplementary material for: Assessing Agreement in Exposure Classification between Proximity-Based Metrics and Air Monitoring Data in Epidemiology Studies of Unconventional Resource Development
Source: MDPI journal article supplement (doi:10.3390/ijerph16173055), 2019-08-23
Supplement: s1 [file s1]

Supplementary Materials: The following are available online at [www.mdpi.com/xxx/s1](http://www.mdpi.com/xxx/s1), Figure S1: Weighted kappa statistics assessing agreement between quartiles of exposure for the four WA metrics and quartiles of 90-day average mean pollutant concentrations, Pennsylvania unconventional gas wells, 2011-2015, Figure S2: Weighted kappa statistics assessing agreement between quartiles of exposure for the four WA metrics and quartiles of 180-day average mean pollutant concentrations, Pennsylvania unconventional gas wells, 2011-2015.

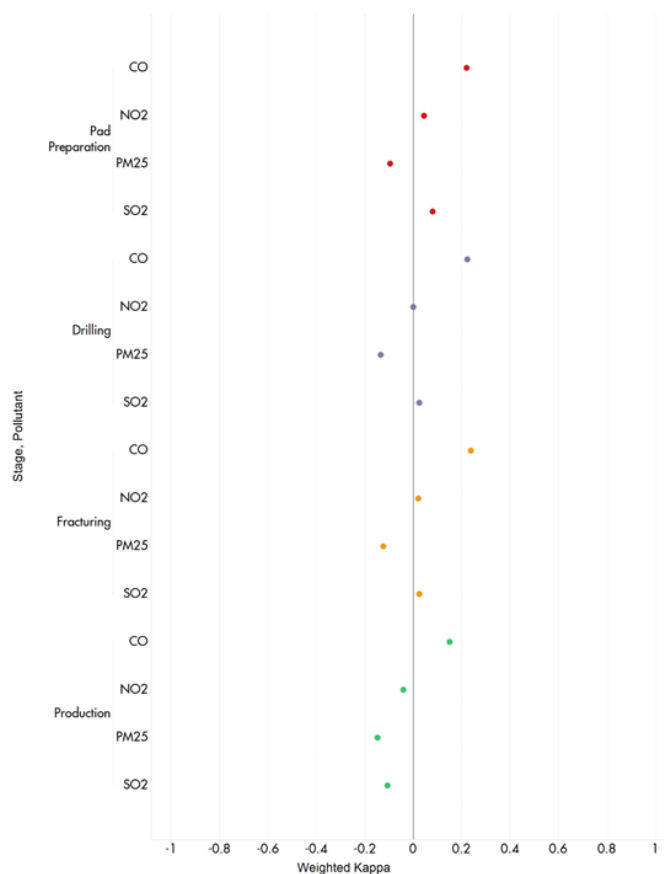

**Figure S1.** Weighted kappa statistics assessing agreement between quartiles of exposure for the four well activity metrics and quartiles of 90-day average mean pollutant concentrations, Pennsylvania unconventional gas wells, 2011–2015.

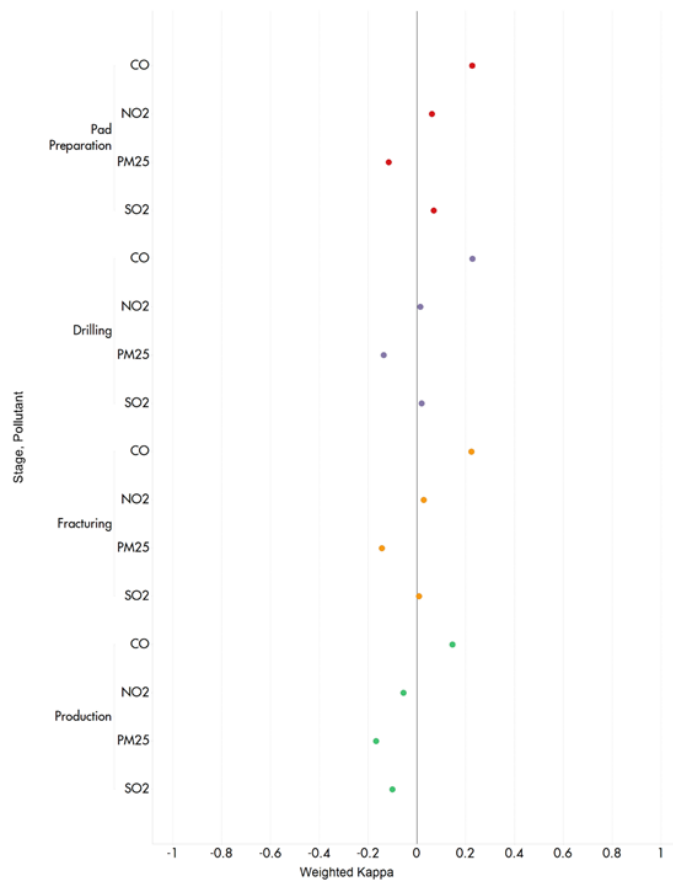

**Figure S2.** Weighted kappa statistics assessing agreement between quartiles of exposure for the four well activity metrics and quartiles of 180-day average mean pollutant concentrations, Pennsylvania unconventional gas wells, 2011–2015.
